# Supplementary material
Source: HighWire-hosted journal article supplement (http://www.cmajopen.ca/highwire/filestream/81001/field_highwire_adjunct_files/2/open-2016-0027-original-submission.pdf)
Supplement: open-2016-0027-original-submission.pdf [file open-2016-0027-original-submission.pdf]

## STROBE Statement—checklist of items that should be included in reports of observational studies

|                              | Item No | Recommendation                                                                                                                                                                             | Page |
|------------------------------|---------|--------------------------------------------------------------------------------------------------------------------------------------------------------------------------------------------|------|
| <b>Title and abstract</b>    | 1       | (a) Indicate the study's design with a commonly used term in the title or the abstract                                                                                                     | 1    |
|                              |         | (b) Provide in the abstract an informative and balanced summary of what was done and what was found                                                                                        | 2-3  |
| <b>Introduction</b>          |         |                                                                                                                                                                                            |      |
| Background/rationale         | 2       | Explain the scientific background and rationale for the investigation being reported                                                                                                       | 4-5  |
| Objectives                   | 3       | State specific objectives, including any prespecified hypotheses                                                                                                                           | 5    |
| <b>Methods</b>               |         |                                                                                                                                                                                            |      |
| Study design                 | 4       | Present key elements of study design early in the paper                                                                                                                                    | 6    |
| Setting                      | 5       | Describe the setting, locations, and relevant dates, including periods of recruitment, exposure, follow-up, and data collection                                                            | 6    |
| Participants                 | 6       | (a) <i>Cohort study</i> —Give the eligibility criteria, and the sources and methods of selection of participants. Describe methods of follow-up                                            | 7-11 |
|                              |         | <i>Case-control study</i> —Give the eligibility criteria, and the sources and methods of case ascertainment and control selection. Give the rationale for the choice of cases and controls |      |
|                              |         | <i>Cross-sectional study</i> —Give the eligibility criteria, and the sources and methods of selection of participants                                                                      | N/A  |
|                              |         | (b) <i>Cohort study</i> —For matched studies, give matching criteria and number of exposed and unexposed                                                                                   |      |
|                              |         | <i>Case-control study</i> —For matched studies, give matching criteria and the number of controls per case                                                                                 |      |
| Variables                    | 7       | Clearly define all outcomes, exposures, predictors, potential confounders, and effect modifiers. Give diagnostic criteria, if applicable                                                   | 7-11 |
| Data sources/<br>measurement | 8*      | For each variable of interest, give sources of data and details of methods of assessment (measurement). Describe comparability of assessment methods if there is more than one group       | 7-11 |
| Bias                         | 9       | Describe any efforts to address potential sources of bias                                                                                                                                  | 7-11 |
| Study size                   | 10      | Explain how the study size was arrived at                                                                                                                                                  | 7    |
| Quantitative variables       | 11      | Explain how quantitative variables were handled in the analyses. If applicable, describe which groupings were chosen and why                                                               | 29   |
| Statistical methods          | 12      | (a) Describe all statistical methods, including those used to control for confounding                                                                                                      | 7-11 |
|                              |         | (b) Describe any methods used to examine subgroups and interactions                                                                                                                        | 7-11 |

1  
2  
3  
4  
5  
6  
7  
8  
9  
10  
11  
12  
13  
14  
15  
16  
17  
18  
19  
20  
21  
22  
23  
24  
25  
26  
27  
28  
29  
30  
31  
32  
33  
34  
35  
36  
37  
38  
39  
40  
41  
42  
43  
44  
45  
46  
47  
48  
49  
50  
51  
52  
53  
54  
55  
56  
57  
58  
59  
60

---

(c) Explain how missing data were addressed

---

(d) *Cohort study*—If applicable, explain how loss to follow-up was addressed

*Case-control study*—If applicable, explain how matching of cases and controls was addressed 7-11

*Cross-sectional study*—If applicable, describe analytical methods taking account of sampling strategy

---

(e) Describe any sensitivity analyses

Continued on next page

Confidential

| <b>Results</b>           |     | <b>Page</b>                                                                                                                                                                                                  |                  |
|--------------------------|-----|--------------------------------------------------------------------------------------------------------------------------------------------------------------------------------------------------------------|------------------|
| Participants             | 13* | (a) Report numbers of individuals at each stage of study—eg numbers potentially eligible, examined for eligibility, confirmed eligible, included in the study, completing follow-up, and analysed            | 12               |
|                          |     | (b) Give reasons for non-participation at each stage                                                                                                                                                         | N/A              |
|                          |     | (c) Consider use of a flow diagram                                                                                                                                                                           | N/A              |
| Descriptive data         | 14* | (a) Give characteristics of study participants (eg demographic, clinical, social) and information on exposures and potential confounders                                                                     | 22-23            |
|                          |     | (b) Indicate number of participants with missing data for each variable of interest                                                                                                                          | N/A (no missing) |
|                          |     | (c) <i>Cohort study</i> —Summarise follow-up time (eg, average and total amount)                                                                                                                             | 26-27            |
| Outcome data             | 15* | <i>Cohort study</i> —Report numbers of outcome events or summary measures over time                                                                                                                          | 26-27            |
|                          |     | <i>Case-control study</i> —Report numbers in each exposure category, or summary measures of exposure                                                                                                         | N/A              |
|                          |     | <i>Cross-sectional study</i> —Report numbers of outcome events or summary measures                                                                                                                           | N/A              |
| Main results             | 16  | (a) Give unadjusted estimates and, if applicable, confounder-adjusted estimates and their precision (eg, 95% confidence interval). Make clear which confounders were adjusted for and why they were included | 24-25            |
|                          |     | (b) Report category boundaries when continuous variables were categorized                                                                                                                                    | N/A              |
|                          |     | (c) If relevant, consider translating estimates of relative risk into absolute risk for a meaningful time period                                                                                             | N/A              |
| Other analyses           | 17  | Report other analyses done—eg analyses of subgroups and interactions, and sensitivity analyses                                                                                                               | 7-11             |
| <b>Discussion</b>        |     |                                                                                                                                                                                                              |                  |
| Key results              | 18  | Summarise key results with reference to study objectives                                                                                                                                                     | 12-13            |
| Limitations              | 19  | Discuss limitations of the study, taking into account sources of potential bias or imprecision. Discuss both direction and magnitude of any potential bias                                                   | 16-17            |
| Interpretation           | 20  | Give a cautious overall interpretation of results considering objectives, limitations, multiplicity of analyses, results from similar studies, and other relevant evidence                                   | 14-16            |
| Generalisability         | 21  | Discuss the generalisability (external validity) of the study results                                                                                                                                        | 17               |
| <b>Other information</b> |     |                                                                                                                                                                                                              |                  |
| Funding                  | 22  | Give the source of funding and the role of the funders for the present study and, if applicable, for the original study on which the present article is based                                                | 19               |

\*Give information separately for cases and controls in case-control studies and, if applicable, for exposed and unexposed groups in cohort and cross-sectional studies.

1  
2  
3  
4  
5  
6  
7  
8  
9  
10  
11  
12  
13  
14  
15  
16  
17  
18  
19  
20  
21  
22  
23  
24  
25  
26  
27  
28  
29  
30  
31  
32  
33  
34  
35  
36  
37  
38  
39  
40  
41  
42  
43  
44  
45  
46  
47  
48  
49  
50  
51  
52  
53  
54  
55  
56  
57  
58  
59  
60

**Note:** An Explanation and Elaboration article discusses each checklist item and gives methodological background and published examples of transparent reporting. The STROBE checklist is best used in conjunction with this article (freely available on the Web sites of PLoS Medicine at <http://www.plosmedicine.org/>, Annals of Internal Medicine at <http://www.annals.org/>, and Epidemiology at <http://www.epidem.com/>). Information on the STROBE Initiative is available at [www.strobe-statement.org](http://www.strobe-statement.org).

Confidential

1  
2  
3  
4  
5  
6  
7  
8  
9  
10  
11  
12  
13  
14  
15  
16  
17  
18  
19  
20  
21  
22  
23  
24  
25  
26  
27  
28  
29  
30  
31  
32  
33  
34  
35  
36  
37  
38  
39  
40  
41  
42  
43  
44  
45  
46  
47  
48  
49  
50  
51  
52  
53  
54  
55  
56  
57  
58  
59  
60

**FACTORS ASSOCIATED WITH DISABILITY BENEFITS CLAIM DURATION AMONG  
CANADIAN WORKERS: A RETROSPECTIVE COHORT STUDY**

Sohail M. Mulla, PhD<sup>1,2</sup> [mullasm@mcmaster.ca](mailto:mullasm@mcmaster.ca)  
Sun Makosso-Kallyth, PhD<sup>3,4</sup> [makossok@mcmaster.ca](mailto:makossok@mcmaster.ca)  
Nathalie St-Hilaire<sup>5</sup> [nathalie.st-hilaire@ssq.ca](mailto:nathalie.st-hilaire@ssq.ca)  
Katrena Munsch, MSc<sup>5</sup> [katrena.munsch@ssq.ca](mailto:katrena.munsch@ssq.ca)  
Peter B. Gove, MSW<sup>5</sup> [pbig@golden.net](mailto:pbig@golden.net)  
Diane Heels-Ansdell, MSc<sup>1</sup> [ansdell@mcmaster.ca](mailto:ansdell@mcmaster.ca)  
Gordon H. Guyatt, MD, MSc<sup>1,6</sup> [guyatt@mcmaster.ca](mailto:guyatt@mcmaster.ca)  
Jason W. Busse, DC, PhD<sup>1,3,4</sup> [bussejw@mcmaster.ca](mailto:bussejw@mcmaster.ca)

<sup>1</sup>Department of Clinical Epidemiology & Biostatistics, McMaster University, Hamilton, Ontario, Canada

<sup>2</sup>Outcomes Research Consortium, Cleveland, Ohio, USA

<sup>3</sup>Michael G. DeGroote Institute for Pain Research and Care, McMaster University, Hamilton, Ontario, Canada

<sup>4</sup>Department of Anesthesia, McMaster University, Hamilton, Ontario, Canada

<sup>5</sup>SSQ, Life Insurance Company Inc.

<sup>6</sup>Department of Medicine, McMaster University, Hamilton, Ontario, Canada

**ABSTRACT**

Background: Disability insurance protects workers from total loss of income in case of a disabling injury or illness by providing wage-replacement benefits. To better inform early identification of claims at risk of prolonged recovery, we explored predictors of disability benefits claim duration.

Methods: Using administrative data from SSQ Financial, a private Canadian disability insurer, we evaluated the association between nine variables and short-term and long-term disability benefits duration using Cox proportional hazards regression analyses.

Results: For both short-term disability (n=70,776) and long-term disability (n=22,205) claims, and across all disorders, older age, female gender, heavy job demands, presence of comorbidity, attending an independent medical evaluation, receipt of rehabilitation therapy, and longer time to claim approval were associated with longer claim duration. Higher pre-disability salary was associated with longer short-term disability claim duration. Quebec residency was associated with longer short-term disability claim duration among workers with psychological disorders, but shorter short-term disability claim duration among those with musculoskeletal complaints and other illnesses. For long-term disability claims, however, residing in Quebec was associated with shorter claim duration, although the magnitude of the association differed across clinical conditions.

Interpretation: The factors we found to be associated with short-term and long-term disability claim duration may be helpful to identify claims at risk of prolonged

1  
2  
3 recovery. Our study has limitations, however, and well-designed prospective studies  
4  
5 are needed to confirm our findings and identify other promising predictors.  
6  
7  
8  
9  
10  
11  
12  
13  
14  
15  
16  
17  
18  
19  
20  
21  
22  
23  
24  
25  
26  
27  
28  
29  
30  
31  
32  
33  
34  
35  
36  
37  
38  
39  
40  
41  
42  
43  
44  
45  
46  
47  
48  
49  
50  
51  
52  
53  
54  
55  
56  
57  
58  
59  
60

Confidential

## INTRODUCTION

According to the 2012 Canadian Survey on Disability, approximately 3.8 million Canadians aged 15 years and older (13.7%) reported a disability.(1) Disabilities often create barriers for participation in the labour force, and the resulting financial implications can be substantial, especially when absences from work are protracted.(2, 3) Although workers' compensation plans are mandatory in Canada, they do not provide coverage for all workers or for non-work-related injuries or illnesses (e.g. injuries acquired outside of work, diabetes, rheumatoid arthritis). Employees wishing to obtain coverage for disabling injuries or illnesses not covered by compensation boards can purchase disability benefits through private for-profit, providers. In Canada, short-term disability benefits plans typically provide wage-replacement benefits for 17 or 26 weeks. Long-term disability coverage begins when short-term disability benefits run out, with most policies providing coverage up to age 65, as long as claimants remain disabled from their own occupation for the initial two years of the claim, and disabled from any and all occupations for which they are qualified by training or experience after they have been on claim for two years. Insurance companies monitor claimants' medical conditions and, should they improve to the point where claimants no longer meet the definition of disability, terminate payments.

We have previously reported, in a study conducted in partnership with Sun Life Financial Canada, several administrative, clinical, and demographic factors associated with disability benefits claim duration among depressed workers.(4) It remains



1  
2  
3 uncertain, however, whether these associations are consistent among other private  
4  
5 insurers and other clinical conditions. This is important to address, as understanding  
6  
7 of factors associated with claim duration - especially those that are modifiable - may  
8  
9 help insurers optimize case management policies and processes to facilitate faster  
10  
11 recovery. Hence, we sought, using data from another private Canadian disability  
12  
13 insurer - SSQ, Life Insurance Company Inc. (hereafter referred to as SSQ) - to identify  
14  
15 factors associated with disability benefits duration among Canadian workers.  
16  
17  
18  
19  
20  
21  
22  
23  
24  
25  
26  
27  
28  
29  
30  
31  
32  
33  
34  
35  
36  
37  
38  
39  
40  
41  
42  
43  
44  
45  
46  
47  
48  
49  
50  
51  
52  
53  
54  
55  
56  
57  
58  
59  
60

Confidential

## METHODS

### *Standardized reporting*

We followed the Strengthening the Reporting of Observational studies in Epidemiology statement.(5)

### *Setting*

SSQ is the parent company of SSQ Financial Group and comprises three affiliates - SSQ General Insurance Company Inc., SSQ Insurance Company Inc., and SSQ Realty Inc. SSQ Financial Group offers a range of financial products and services across Canada, including traditional group plans for health insurance, prescription drug insurance, disability insurance, compassion insurance, life insurance, dental care insurance, health spending accounts, and travel insurance. In addition to offering standard short-term and long-term disability benefit plans, SSQ offers “additional” short-term and long-term disability plans, which may be paid simultaneously or subsequently to the standard plans. The “additional” plans differ from standard plans with respect to several factors, including financial, e.g. lower or greater portion of pre-disability salary paid, or administrative, e.g. shorter or longer duration to change in disability definition date.

### *Design*

Retrospective cohort study.

### *Source of data*

1  
2  
3 We examined all claims SSQ approved for short-term and/or long-term disability  
4  
5 benefits from January 1, 2007 to March 31, 2014, which represented the most recent  
6  
7 consecutive period for which SSQ collected data consistently and was available  
8  
9 electronically.  
10  
11

### 12 13 14 15 *Outcomes*

16  
17 Our primary outcomes were short-term and long-term disability claim duration.  
18  
19

### 20 21 22 *Statistical analysis*

23  
24 For our analyses, we considered claimants who received only short-term disability  
25  
26 benefits, only long-term disability benefits, or both short-term and long-term  
27  
28 disability benefits for the same disability from SSQ. If a claimant received both short-  
29  
30 term and long-term disability benefits for the same disability, so long as each plan  
31  
32 was only of one type, i.e. either standard or “additional,” that claimant contributed  
33  
34 once in each short-term and long-term disability model.  
35  
36  
37  
38  
39

40  
41 Guided by our previous study(4) and content experts on our team, we selected, *a*  
42  
43 *priori*, 10 variables that may be associated with claim duration, and predicted the  
44  
45 direction of anticipated effects (Appendix 1). Claimants for whom SSQ manages both  
46  
47 short-term and long-term disability benefit plans do not undergo a separate approval  
48  
49 process for long-term disability; rather, there is no delay between moving from short-  
50  
51 term to long-term disability benefits as long as claimants qualify. For such claimants,  
52  
53 we used the duration of claim approval for the short-term disability plan that SSQ  
54  
55  
56  
57  
58  
59  
60

1  
2  
3 recorded in its database, and imputed a value of 0 days to represent the duration of  
4 approval for the corresponding long-term disability plan. We considered two variables  
5 - attendance at an independent medical evaluation arranged by SSQ, and receipt of  
6 rehabilitation service funded by SSQ - as time-varying covariates to account for when  
7 they were initiated during the course of the disability claim.  
8  
9  
10  
11  
12  
13  
14  
15  
16  
17

18 We screened all data to identify implausible values, inconsistencies, and missing data.  
19  
20 When we identified implausible values and inconsistencies, we worked with SSQ to  
21 correct the data. We report the mean and standard deviation (SD) of normally  
22 distributed continuous variables, the median and interquartile range for continuous  
23 variables not normally distributed and, for categorical variables, number of  
24 occurrences as percentages.  
25  
26  
27  
28  
29  
30  
31  
32  
33

34 We tested for pairwise correlations between independent variables using a correlation  
35 matrix; if the Pearson Correlation Coefficient ( $r$ ) was  $>0.80$  for two variables, we  
36 removed the variable that we deemed of lesser importance. This situation arose once:  
37 claimants' province of residence and the office at which the claims were received  
38 were highly correlated ( $r=0.89$  for short-term disability model;  $r=0.93$  for long-term  
39 disability model). Administrators at SSQ advised that they were more interested in  
40 province of residence, due to the potential influence of provincial differences in  
41 healthcare services and legislature affecting claims. Accordingly, we removed the  
42 claim office variable from our models, leaving us with nine variables. For the  
43 remaining variables, we tested for multicollinearity by calculating the variance  
44  
45  
46  
47  
48  
49  
50  
51  
52  
53  
54  
55  
56  
57  
58  
59  
60

1  
2  
3 inflation factors (VIFs) associated with each independent variable in our models, and  
4  
5 considered values  $\geq 5$  to indicate the presence of multicollinearity; associated VIFs  
6  
7 were all  $< 2$ .  
8  
9

10  
11  
12 We performed time-to-event analyses using Cox proportional hazards regression  
13  
14 models to assess the association between the independent variables and duration of  
15  
16 short-term and long-term disability benefits. Our event was cessation of disability  
17  
18 benefits. For short-term disability claims that were receiving benefits for 17 weeks  
19  
20 (the most common short-term disability benefit plan duration administered by SSQ)  
21  
22 after claim approval, we used 118 days (17 weeks minus 1 day) as our censoring point;  
23  
24 for long-term disability claims, we used the date of extraction as our censoring point.  
25  
26 To avoid overfitting, we required  $\geq 10$  events per variable for our Cox regression  
27  
28 models. (6) We excluded independent variables with  $< 200$  observations, unless we  
29  
30 were able to collapse them with other related variables to exceed this threshold. To  
31  
32 confirm that the proportional hazards assumption was met for each variable in our  
33  
34 model, we calculated its interaction with time, while entering the remaining variables  
35  
36 in the model without interactions. Statistical tests conducted when a data set is very  
37  
38 large may, however, show statistical significance when the magnitude of effect is  
39  
40 trivial. Therefore, when an interaction was significant, we calculated the hazard  
41  
42 ratios (HRs) at different time-points, as follows: short-term disability: 30 and 90 days;  
43  
44 long-term disability : 180 days, 365 days (1 year), and 548 days (2.5 years); if the HRs  
45  
46 did not differ by  $\geq 0.20$  across the time-points, we did not consider the proportional  
47  
48 hazards assumption to be violated. We calculated HRs for our analyses, their  
49  
50  
51  
52  
53  
54  
55  
56  
57  
58  
59  
60

1  
2  
3 associated 99% confidence intervals (CIs), and associated p-values. To minimize the  
4 likelihood of spurious findings, we considered an independent variable as statistically  
5 significant if it had a  $p < 0.01$  in each final adjusted model.  
6  
7  
8  
9

10  
11  
12 We conducted post-hoc analyses to explore if independent variables were consistently  
13 predictive of short-term and long-term disability benefits duration across clusters of  
14 clinical conditions. We conducted our analyses for each of three subgroups of  
15 claimants, according to pre-defined classifications of illness or injury: (1)  
16 psychological disorders, (2) musculoskeletal complaints, and (3) other clinical  
17 conditions. For each variable in our models, we calculated its interaction with  
18 clinical condition, while entering the remaining variables in the model without  
19 interactions. When an interaction was significant, we compared the HRs across the  
20 clinical subgroups for substantial differences in effect sizes: if the HRs did not vary by  
21  $\geq 0.20$  across the different models, we presented the effect sizes from the overall  
22 model; if the HRs varied by  $\geq 0.20$ , we presented the effects of the respective  
23 independent variable(s) separately for each clinical subgroup.  
24  
25  
26  
27  
28  
29  
30  
31  
32  
33  
34  
35  
36  
37  
38  
39  
40  
41  
42  
43

44 We conducted all statistical analyses using SAS (version 9.3) and created plots using  
45 IBM SPSS Statistics (version 20.0).  
46  
47  
48

#### 49 50 *Research ethics*

51 The Hamilton Integrated Research Ethics Board approved our study.  
52  
53  
54  
55  
56  
57  
58  
59  
60

## RESULTS

Our study sample consisted of 70,776 short-term and 22,205 long-term disability claims. Table 1 presents the baseline characteristics of our study sample.

### *Short-term disability*

Of 70,776 short-term disability claims, 57,158 (80.8%) were closed prior to 17 weeks, and 13,618 (19.2%) were censored (Figure 1).

Our adjusted Cox regression analysis showed associations between older age (HR [99% CI] = 0.87 [0.86 to 0.88], per decade), higher pre-disability salary (0.95 [0.92 to 0.99], per \$1000 per week), female gender (0.88 [0.85 to 0.90]), heavy job demands (0.93 [0.90 to 0.96]), report of comorbidity (0.65 [0.63 to 0.67]), attending an independent medical evaluation (0.23 [0.20 to 0.27]), receipt of rehabilitation therapy (0.21 [0.18 to 0.25]), and longer time to claim approval (0.95 [0.95 to 0.96], per week) and longer short-term disability claim duration (Table 2). Claimants with psychological disorders who resided in Quebec were more likely (0.69 [0.63 to 0.74]) to have longer short-term disability claims than those from other provinces; conversely, claimants with musculoskeletal complaints and other illnesses from Quebec were more likely to have shorter short-term disability claims versus claimants from elsewhere in Canada: 1.15 [1.10 to 1.22] for musculoskeletal complaints; 1.08 [1.04 to 1.12] for other illnesses.

### *Long-term disability*

1  
2  
3 Of 22,205 long-term disability claims, 17,474 (78.7%) were closed when we extracted  
4 our data, and 4,731 (21.3%) were censored (Figure 2).  
5  
6  
7  
8  
9

10 Our adjusted regression analysis showed older age (HR [99% CI] = 0.82 [0.80 to 0.83],  
11 per decade), female gender (0.94 [0.90 to 0.98]), heavy job demands (0.94 [0.89 to  
12 0.99]), report of comorbidity (0.75 [0.72 to 0.79]), attending an independent medical  
13 evaluation (0.57 [0.53 to 0.61]), receipt of rehabilitation therapy (0.55 [0.52 to  
14 0.59]), and longer time to claim approval (0.93 [0.92 to 0.94], per week) were  
15 associated with longer long-term disability claim duration (Table 3). Further, we  
16 found Quebec residency was associated with shorter long-term disability claim  
17 duration, although the magnitude of the effect varied according to claimants' clinical  
18 condition: 1.54 [1.38 to 1.71] for psychological disorders; 1.39 [1.28 to 1.51] for  
19 musculoskeletal complaints; 1.19 [1.10 to 1.28] for other illnesses.  
20  
21  
22  
23  
24  
25  
26  
27  
28  
29  
30  
31  
32  
33  
34  
35  
36  
37  
38  
39  
40  
41  
42  
43  
44  
45  
46  
47  
48  
49  
50  
51  
52  
53  
54  
55  
56  
57  
58  
59  
60

Table 4 presents the comparison between our anticipated direction of effects and the observed results.



## INTERPRETATION

### *Main findings*

For both short-term and long-term disability claims, older age, female gender, heavy job demands, presence of comorbidity, attending an independent medical evaluation, receipt of rehabilitation therapy, and longer time to claim approval were associated with longer claim duration. Higher pre-disability salary was associated with longer short-term disability claim duration. Residing in Quebec was associated with longer short-term disability claim duration for claimants with psychological disorders, but shorter short-term disability benefits duration for claimants with musculoskeletal complaints and other illnesses. For long-term disability claims, residing in Quebec was associated with shorter claim duration across all clinical conditions.

### *Explanation and comparison with other studies*

Our findings are consistent with our previous study, which suggested older age, female gender (short-term disability claims only), higher salary, and co-morbidity were associated with longer claim duration among claimants with depression.<sup>(4)</sup> In our previous study, prolonged time to claim approval was only associated with longer long-term disability claim duration; in the current study, however, longer claim approval duration was associated with longer short-term and long-term disability claim duration. Minimizing time to claim approval may be a promising target for reducing claim duration. Furthermore, long-term disability claims may benefit from the continuity of care when the same provider has overseen short-term disability claim management.

1  
2  
3  
4  
5  
6 We previously found that residing in Quebec (versus Ontario) was associated with  
7  
8 longer short-term disability claim duration, but shorter long-term disability claim  
9  
10 duration.(4) Now, we report a similar association among SSQ claimants with  
11  
12 psychological disorders who resided in Quebec versus elsewhere in Canada. Among  
13  
14 claimants with musculoskeletal complaints and other illnesses, however, Quebec  
15  
16 residency was associated with shorter short-term and long-term disability benefit  
17  
18 duration. Systematic differences in claim management policies and processes in  
19  
20 Quebec may explain variation in claim duration. For instance, Quebec is the only  
21  
22 province with a civil code, the rest of Canada uses the common law. Under the civil  
23  
24 code in Quebec, should claimants wish to commence a legal action against their  
25  
26 disability insurer for terminating a claim, they must pay a retainer to obtain counsel;  
27  
28 in the common law provinces, there is no such requirement. Further, there are no  
29  
30 significant damage awards given under the civil code, whereas in the common law  
31  
32 provinces, there is case law with damage awards in excess of \$1 million. These  
33  
34 policies may provide greater incentive for litigation outside of Quebec, which is  
35  
36 associated with prolonged disability.(7-9)  
37  
38  
39  
40  
41  
42  
43  
44  
45

46 Our results are consistent with previous evidence suggesting heavy physical job  
47  
48 demands are associated with delayed recovery.(10-15) Contrary to our hypotheses,  
49  
50 however, we found claimants who attended an independent medical evaluation or  
51  
52 received rehabilitation service are more likely to experience prolonged claim  
53  
54 duration. We were unable to adjust for injury or illness severity, and it is possible  
55  
56  
57  
58  
59  
60

1  
2  
3 these interventions are largely directed towards claimants who are sicker or more  
4  
5 seriously injured, and would therefore experience longer claim duration.  
6  
7  
8  
9

### 10 *Strengths and limitations*

11  
12 Strengths of our study include *a priori* selection of independent variables for our  
13  
14 regression models, including the anticipated direction of effects. Other strengths  
15  
16 include no missing data, and correction of all identifiable data errors and  
17  
18 inconsistencies. Limitations of our study include the retrospective study design, which  
19  
20 did not allow us to investigate certain variables in detail, e.g. reasons for arranging  
21  
22 independent medical evaluations and rehabilitation; as well, a number of variables  
23  
24 known to affect claim duration were unavailable, e.g., injury or illness severity.  
25  
26  
27 Second, our primary outcome, i.e. disability claim duration, underestimates total  
28  
29 disability duration, as benefits start date may not coincide with disability start date,  
30  
31 especially among claimants who qualify for long-term disability benefits, but have to  
32  
33 wait before receiving payments, i.e. the elimination period. Further, claim closure is  
34  
35 a surrogate for patient-important outcomes, such as functional recovery and sustained  
36  
37 return to work.(4) In addition, our results may not be generalizable to individuals who  
38  
39 present with work-related disability, as those claims would be submitted to provincial  
40  
41 compensation boards. Last, our analyses did not account for the effects of clustering  
42  
43 arising from claimants who may have multiple disabilities over the time period of the  
44  
45 study, and who would have contributed more than one claim to our dataset. The  
46  
47 direction of bias associated with more than one claim from an individual is difficult to  
48  
49 predict: it could lead to over or underestimates of the magnitude of association.  
50  
51  
52  
53  
54  
55  
56  
57  
58  
59  
60

1  
2  
3  
4  
5  
6 *Conclusions and implications for practice and future research*  
7

8 We found two previously untested predictors of short-term and long-term disability  
9 benefits duration - attendance at an independent medical evaluation and receipt of  
10 rehabilitation. Further, claimants' age, gender, job demands, presence of  
11 comorbidity, attendance at an independent medical evaluation, receipt of  
12 rehabilitation therapy, and time to claim approval factors were consistently  
13 predictive of benefits duration, irrespective of clinical condition. Quebec residency  
14 was associated with longer short-term disability claim duration among workers with  
15 psychological disorders, but shorter short-term disability claim duration among those  
16 with musculoskeletal complaints and other illnesses; for long-term disability claims,  
17 residing in Quebec was associated with shorter claim duration, although the  
18 magnitude of the association differed across clinical conditions. Our results provide a  
19 direction for randomized trials that address determinants of return to work.  
20 Modifiable factors, such as time to claim approval, are subject to interventions that  
21 may decrease claim duration. Non-modifiable risk factors could allow identification of  
22 claims at high risk of prolonged recovery who might then be targeted for  
23 interventions, like psychotherapy, for which preliminary evidence suggests possible  
24 benefit.(4, 16)  
25  
26  
27  
28  
29  
30  
31  
32  
33  
34  
35  
36  
37  
38  
39  
40  
41  
42  
43  
44  
45  
46  
47  
48  
49  
50  
51  
52  
53  
54  
55  
56  
57  
58  
59  
60

1  
2  
3 **FOOTNOTES**  
4  
5  
6  
7

8 **Funding:** SMM received a MITACS Accelerate Doctoral Award that was partially funded  
9  
10 by SSQ Financial Inc.  
11

12  
13  
14  
15 **Acknowledgements:** The authors thank Drs. Norman Buckley, Shanil Ebrahim, and  
16  
17 Lehana Thabane for helpful discussions.  
18  
19

20  
21  
22 **Competing interests:** All authors report no conflicts of interest.  
23  
24  
25  
26  
27  
28  
29  
30  
31  
32  
33  
34  
35  
36  
37  
38  
39  
40  
41  
42  
43  
44  
45  
46  
47  
48  
49  
50  
51  
52  
53  
54  
55  
56  
57  
58  
59  
60

Confidential

## REFERENCES

1. Canada S. Table 1: Number and percentage with and without disabilities, aged 15 years or older, Canada, provinces and territories, 2012: Government of Canada; 2015. Available from: <http://www.statcan.gc.ca/pub/89-654-x/2015001/tbl/tbl01-eng.htm>.
2. Canada S. Canadian Survey on Disability (CSD): Government of Canada; 2012. Available from: [www.statcan.gc.ca/csd](http://www.statcan.gc.ca/csd).
3. Canada S. Days lost per worker due to illness or disability, by sex, by province (Both sexes): Government of Canada; 2015. Available from: <http://www.statcan.gc.ca/tables-tableaux/sum-som/l01/cst01/health47a-eng.htm>.
4. Ebrahim S, Guyatt GH, Walter SD, Heels-Ansdell D, Bellman M, Hanna SE, et al. Association of psychotherapy with disability benefit claim closure among patients disabled due to depression. *PLoS one*. 2013;8(6):e67162.
5. von Elm E, Altman DG, Egger M, Pocock SJ, Gotsche PC, Vandenbroucke JP. The Strengthening the Reporting of Observational Studies in Epidemiology (STROBE) statement: guidelines for reporting observational studies. *Lancet*. 2007;370(9596):1453-7.
6. Peduzzi P, Concato J, Feinstein AR, Holford TR. Importance of events per independent variable in proportional hazards regression analysis. II. Accuracy and precision of regression estimates. *Journal of clinical epidemiology*. 1995;48(12):1503-10.
7. Casey PP, Feyer AM, Cameron ID. Associations with duration of compensation following whiplash sustained in a motor vehicle crash. *Injury*. 2015;46(9):1848-55.
8. Bernacki EJ, Tao XG. The relationship between attorney involvement, claim duration, and workers' compensation costs. *Journal of occupational and environmental medicine / American College of Occupational and Environmental Medicine*. 2008;50(9):1013-8.
9. Suter PB. Employment and litigation: improved by work, assisted by verdict. *Pain*. 2002;100(3):249-57.
10. de Jonge J, Spoor E, Sonnentag S, Dormann C, van den Tooren M. "Take a break?!" Off-job recovery, job demands, and job resources as predictors of health, active learning, and creativity. *European Journal of Work and Organizational Psychology*. 2012;21(3):321-48.
11. Kuper H, Marmot M. Job strain, job demands, decision latitude, and risk of coronary heart disease within the Whitehall II study. *Journal of epidemiology and community health*. 2003;57(2):147-53.
12. Sonnentag S, Zijlstra FR. Job characteristics and off-job activities as predictors of need for recovery, well-being, and fatigue. *Journal of Applied Psychology*. 2006;91(2):330.
13. De Lange AH, Kompier MA, Taris TW, Geurts SA, Beckers DG, Houtman IL, et al. A hard day's night: a longitudinal study on the relationships among job demands and job control, sleep quality and fatigue. *Journal of Sleep Research*. 2009;18(3):374-83.
14. Bakker AB, Demerouti E, De Boer E, Schaufeli WB. Job demands and job resources as predictors of absence duration and frequency. *Journal of Vocational Behavior*. 2003;62(2):341-56.
15. Stansfeld S, Candy B. Psychosocial work environment and mental health—a meta-analytic review. *Scandinavian journal of work, environment & health*. 2006:443-62.
16. Ebrahim S, Montoya L, Truong W, Hsu S, Kamal El Din M, Carrasco-Labra A, et al. Effectiveness of cognitive behavioral therapy for depression in patients receiving disability benefits: a systematic review and individual patient data meta-analysis. *PLoS one*. 2012;7(11):e50202.

Table 1. Baseline characteristics

| Variable                               | Short-term disability, n (%)    | Long-term disability, n (%)     |
|----------------------------------------|---------------------------------|---------------------------------|
| Total claimants                        | 70776                           | 22205                           |
| Age: Median (Q1 to Q3) years           | 46 (36 to 53)                   | 48 (40 to 54)                   |
| Gender                                 |                                 |                                 |
| Male                                   | 31068 (43.9%)                   | 10052 (45.3%)                   |
| Female                                 | 39708 (56.1%)                   | 12153 (54.7%)                   |
| Monthly salary: Median (Q1 to Q3)      | \$3695.5 (\$2915.5 to \$4546.5) | \$3521.8 (\$2799.8 to \$4546.5) |
| Job demands                            |                                 |                                 |
| Sedentary                              | 22586 (31.9%)                   | 8104 (36.5%)                    |
| Light                                  | 30217 (42.7%)                   | 8604 (38.8%)                    |
| Heavy                                  | 17973 (25.4%)                   | 5497 (24.8%)                    |
| Province                               |                                 |                                 |
| Quebec                                 | 59117 (83.5%)                   | 16700 (75.2%)                   |
| Other                                  | 11659 (16.5%)                   | 5505 (24.8%)                    |
| Illness                                |                                 |                                 |
| Psychological disorder                 | 15294 (21.6%)                   | 7325 (33.0%)                    |
| Musculoskeletal complaint              | 22124 (31.3%)                   | 7165 (32.3%)                    |
| Other                                  | 33358 (47.1%)                   | 7715 (34.7%)                    |
| Comorbidity                            |                                 |                                 |
| Yes                                    | 10381 (14.7%)                   | 6447 (29.0%)                    |
| No                                     | 60395 (85.3%)                   | 15758 (71.0%)                   |
| Attendance at SSQ-arranged independent |                                 |                                 |

|                                                    |                  |                  |
|----------------------------------------------------|------------------|------------------|
| medical evaluation*                                |                  |                  |
| Yes                                                | 1341 (1.9%)      | 2275 (10.3%)     |
| No                                                 | 64435 (98.1%)    | 19930 (89.8%)    |
| Receipt of SSQ-funded rehabilitation*              |                  |                  |
| Yes                                                | 1098 (1.6%)      | 2552 (11.5%)     |
| No                                                 | 69678 (98.5%)    | 19653 (88.5%)    |
| Time to claim approval:<br>Median (Q1 to Q3) weeks | 1.0 (0.9 to 1.9) | 2.4 (1.1 to 5.6) |

Q1: first quartile; Q3: third quartile.

\*At any point during benefits period.



**Table 2. Determining factors predictive of time to short-term disability benefits duration based multivariable Cox regression analysis**

| Factor                                                          | HR   | 99% CI for HR |       | P-value |
|-----------------------------------------------------------------|------|---------------|-------|---------|
|                                                                 |      | Lower         | Upper |         |
| Age (per 10 years)                                              | 0.87 | 0.86          | 0.88  | <0.0001 |
| Salary (per \$1000 per week)                                    | 0.95 | 0.92          | 0.99  | 0.0003  |
| Gender                                                          |      |               |       |         |
| Female vs. Male (reference group)                               | 0.88 | 0.85          | 0.90  | <0.0001 |
| Job demands                                                     |      |               |       |         |
| Heavy vs. Sedentary (reference group)                           | 0.93 | 0.90          | 0.96  | <0.0001 |
| Light vs. Sedentary (reference group)                           | 0.99 | 0.97          | 1.02  | 0.4963  |
| Province                                                        |      |               |       |         |
| Quebec vs. Other (reference group) by Psychological disorder    | 0.69 | 0.63          | 0.74  | <0.0001 |
| Quebec vs. Other (reference group) by Musculoskeletal complaint | 1.15 | 1.10          | 1.22  | 0.0084  |
| Quebec vs. Other (reference group) by Other illness             | 1.08 | 1.04          | 1.12  | 0.0003  |
| Comorbidity                                                     |      |               |       |         |
| Yes vs. No (reference group)                                    | 0.65 | 0.63          | 0.67  | <0.0001 |
| Attendance at SSQ-arranged independent medical evaluation       |      |               |       |         |
| Yes vs. No (reference group)                                    | 0.23 | 0.20          | 0.27  | <0.0001 |
| Receipt of SSQ-funded rehabilitation                            |      |               |       |         |
| Yes vs. No (reference group)                                    | 0.21 | 0.18          | 0.25  | <0.0001 |
| Duration of claim approval (weeks)                              | 0.95 | 0.95          | 0.96  | <0.0001 |

HR: Hazard ratio; CI: Confidence interval.

HR >1 is associated with shorter claim duration; HR <1 is associated with longer claim duration.

**Table 3. Determining factors predictive of time to long-term disability benefits duration based on multivariable Cox regression analysis**

| Factor                                                          | HR   | 99% CI for HR |       | P-value |
|-----------------------------------------------------------------|------|---------------|-------|---------|
|                                                                 |      | Lower         | Upper |         |
| Age (per 10 years)                                              | 0.82 | 0.80          | 0.83  | <0.0001 |
| Salary (per \$1000 per week)                                    | 1.02 | 0.97          | 1.08  | 0.3525  |
| Gender                                                          |      |               |       |         |
| Female vs. Male (reference group)                               | 0.94 | 0.90          | 0.98  | 0.0001  |
| Job demands                                                     |      |               |       |         |
| Heavy vs. Sedentary (reference group)                           | 0.94 | 0.89          | 0.99  | 0.0022  |
| Light vs. Sedentary (reference group)                           | 1.02 | 0.98          | 1.07  | 0.1912  |
| Province                                                        |      |               |       |         |
| Quebec vs. Other (reference group) by Psychological disorder    | 1.54 | 1.38          | 1.71  | <0.0001 |
| Quebec vs. Other (reference group) by Musculoskeletal complaint | 1.39 | 1.28          | 1.51  | 0.0003  |
| Quebec vs. Other (reference group) by Other illness             | 1.19 | 1.10          | 1.28  | <0.0001 |
| Comorbidity                                                     |      |               |       |         |
| Yes vs. No (reference group)                                    | 0.75 | 0.72          | 0.79  | <0.0001 |
| Attendance at SSQ-arranged independent medical evaluation       |      |               |       |         |
| Yes vs. No (reference group)                                    | 0.57 | 0.53          | 0.61  | <0.0001 |
| Receipt of SSQ-funded rehabilitation                            |      |               |       |         |
| Yes vs. No (reference group)                                    | 0.55 | 0.52          | 0.59  | <0.0001 |
| Duration of claim approval (weeks)                              | 0.93 | 0.92          | 0.94  | <0.0001 |

HR: Hazard ratio; CI: Confidence interval.

HR >1 is associated with shorter claim duration; HR <1 is associated with longer claim duration.

1  
2  
3 **Figure 1. Kaplan Meier (survival) curve of short-term disability duration**  
4

5  
6 Please see attached EMF file.  
7  
8  
9  
10  
11  
12  
13  
14  
15  
16  
17  
18  
19  
20  
21  
22  
23  
24  
25  
26  
27  
28  
29  
30  
31  
32  
33  
34  
35  
36  
37  
38  
39  
40  
41  
42  
43  
44  
45  
46  
47  
48  
49  
50  
51  
52  
53  
54  
55  
56  
57  
58  
59  
60

Confidential

1  
2  
3  
4  
5  
6  
7  
8  
9  
10  
11  
12  
13  
14  
15  
16  
17  
18  
19  
20  
21  
22  
23  
24  
25  
26  
27  
28  
29  
30  
31  
32  
33  
34  
35  
36  
37  
38  
39  
40  
41  
42  
43  
44  
45  
46  
47  
48  
49  
50  
51  
52  
53  
54  
55  
56  
57  
58  
59  
60

**Figure 2. Kaplan Meier (survival) curve of long-term disability duration**

Please see attached EMF file.

Confidential

Table 4. Comparison between predictors associated with claim duration for short-term disability versus long-term disability claims

| Predictor                                                                        | Short-term disability                                                                                               | Long-term disability | Anticipated direction                                       |
|----------------------------------------------------------------------------------|---------------------------------------------------------------------------------------------------------------------|----------------------|-------------------------------------------------------------|
| Older age                                                                        | (-)                                                                                                                 | (-)                  | (-)                                                         |
| Female (versus males)                                                            | (-)                                                                                                                 | (-)                  | (-)                                                         |
| Higher salary                                                                    | (-)                                                                                                                 | NS                   | (-)                                                         |
| Heavy job demands (versus sedentary)                                             | (-)                                                                                                                 | (-)                  | (-)                                                         |
| Light job demands (versus sedentary)                                             | NS                                                                                                                  | NS                   | (-)                                                         |
| Quebec residency (versus else)                                                   | (-) for claimants with psychological disorders, (+) for claimants with musculoskeletal complaints and other illness | (+)                  | (-) for short-term disability, (+) for long-term disability |
| Presence of comorbidity (versus no comorbidity)                                  | (-)                                                                                                                 | (-)                  | (-)                                                         |
| Attendance at SSQ-arranged independent medical evaluation (versus no attendance) | (-)                                                                                                                 | (-)                  | (-)                                                         |
| Receipt of SSQ-funded rehabilitation (versus no receipt of rehabilitation)       | (-)                                                                                                                 | (-)                  | (+)                                                         |
| Longer time to claim approval                                                    | (-)                                                                                                                 | (-)                  | (-)                                                         |

(-) associated with longer claim duration; (+) associated with shorter claim duration; NS: not significant

## APPENDIX 1. Description of variables

| Variable                                        | Description                                                                                    | Anticipated direction of claim duration (for both short-term and long-term disability claims unless otherwise stated) |
|-------------------------------------------------|------------------------------------------------------------------------------------------------|-----------------------------------------------------------------------------------------------------------------------|
| Age                                             | Claimant's age at the beginning of disability                                                  | Older age: (-)                                                                                                        |
| Gender                                          | Claimant's gender                                                                              | Female: (-)                                                                                                           |
| Salary                                          | Claimant's pre-disability gross income                                                         | Higher salary: (-)                                                                                                    |
| Job demands                                     | Physical demands of claimant's job (sedentary, light or heavy)                                 | Heavy: (-)<br>Light: (-)                                                                                              |
| Province                                        | Claimant's province of residence                                                               | Quebec: (-) for short-term disability, Quebec: (+) for long-term disability                                           |
| Comorbidity                                     | If claimant has a secondary illness recorded in their claim file                               | Comorbidity present: (-)                                                                                              |
| Office                                          | If a claim was received at Quebec or National office                                           | Quebec: (-) for short-term disability, Quebec: (+) for long-term disability                                           |
| Attendance at an independent medical evaluation | If claimant has attended an independent medical evaluation                                     | Attendance at an independent medical evaluation: (-)                                                                  |
| Receipt of rehabilitation                       | If claimant has received rehabilitation funded by SSQ Financial or not                         | Receipt of rehabilitation: (+)                                                                                        |
| Duration of claim approval                      | Duration from disability claim registration date to disability claim contractual approval date | Longer duration of claim approval: (-)                                                                                |

(-) associated with longer claim duration; (+) associated with shorter claim duration.

APPENDIX 2. Five most common conditions contributing to analyses, in descending order of prevalence

|                              | Psychological disorder                  | Musculoskeletal complaint                      | Other illness                              |
|------------------------------|-----------------------------------------|------------------------------------------------|--------------------------------------------|
| <b>Short-term disability</b> | Major depression                        | Lumbosacral sprain                             | Pneumonia (acute lobar pneumonia or viral) |
|                              | Adjustment disorder with depressed mood | Carpal tunnel with surgery                     | Inguinal hernia with herniorrhaphy         |
|                              | Adjustment disorder with anxious mood   | Lumbodynia                                     | Pregnancy (complications)                  |
|                              | Adjustment disorder with mixed mood     | Sprained ankle I and II degree                 | Contusions, multiple (traumas)             |
|                              | Anxiety                                 | Shoulder tendinitis                            | Cataract with surgery                      |
| <b>Long-term disability</b>  | Major depression                        | Herniated disc (lumbar hernia) without surgery | Breast cancer                              |
|                              | Adjustment disorder with mixed mood     | Lumbodynia                                     | Lung cancer                                |
|                              | Adjustment disorder with depressed mood | Osteoarthritis                                 | Multiple sclerosis (advanced or acute)     |
|                              | Adjustment disorder with anxious mood   | Shoulder tendinitis                            | Cerebrovascular accident                   |
|                              | Depressive disorder                     | Lumbosacral sprain                             | Cancer with chemotherapy                   |
